# Supplementary material
Source: Springer Nature journal article supplement (https://www.springermedizin.de/resource/supplementary/12885_2012_3975_MOESM2_ESM.pdf/9464822)
Supplement: MOESM2 [file 9464822]

**Online Table 2:** Hemoglobin and lymph nodes status in human breast cancer patients

| Age   | No. of Cases | No. of Lymph Node Positive | No. of Lymph Node Negative | No. of Unknown | % of Total Patients |
|-------|--------------|----------------------------|----------------------------|----------------|---------------------|
| 20-30 | 10           | 7                          | 3                          | 0              | 6.8                 |
| 31-40 | 78           | 32                         | 44                         | 2              | 52.7                |
| 41-45 | 60           | 23                         | 35                         | 2              | 40.5                |
| Total | 148*         | 62                         | 82                         | 4              | 100                 |

\* In our 148 subject cohort, 8 subjects with ductal carcinoma *in situ* (DCIS) in the lymph node negative group and 4 subjects with unknown status were removed. The cohort included 62 subjects with lymph node invasion (mean age 34.5 years) and 74 subjects without lymph node invasion (mean age 35.4 years). Patients are all Chinese.
